# Supplementary material for: Decreasing dorsal cochlear nucleus activity ameliorates noise-induced tinnitus perception in mice
Source: PubMed Central journal article supplement (PMC9097071; doi:10.1186/s12915-022-01288-1), 2022-05-12

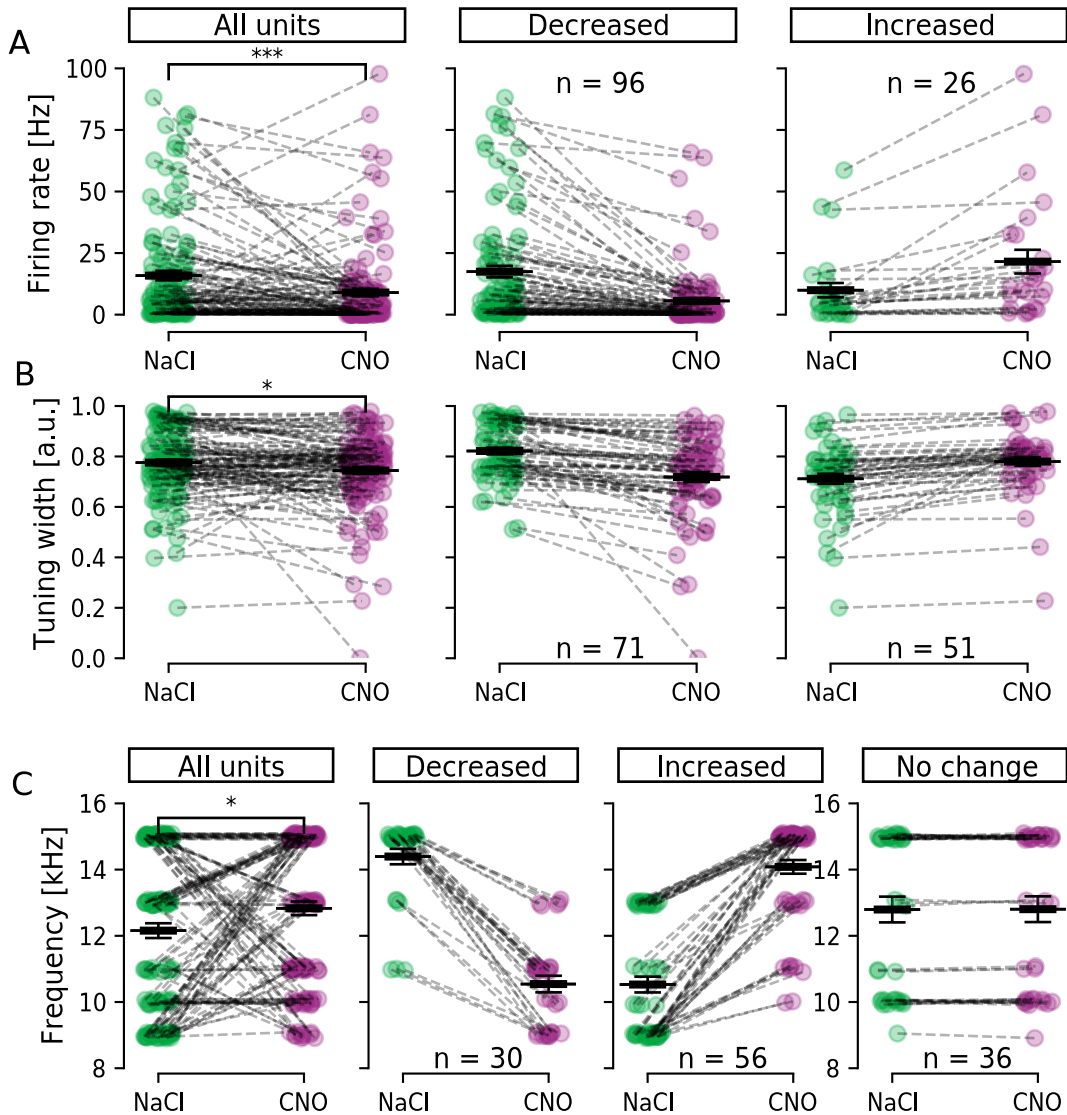

Supplement: 12915_2022_1288_MOESM1_ESM.pdf [file 12915_2022_1288_MOESM1_ESM.pdf]
